# Supplementary material for: Development and Assessment of SNP Genotyping Arrays for Citrus and Its Close Relatives
Source: Plants (Basel). 2024 Feb 29;13(5):691. doi: 10.3390/plants13050691 (PMC10935022; doi:10.3390/plants13050691)
Supplement: Supplementary file 1 [file plants-13-00691-s001.zip › Supplementary tables.xlsx]

## Sheet: S1 sequence heterozygosity
Table S1. Percent heterozygosity at variable bases of accessions in the citrus variant discovery panel. Percent heterozygosity was estimated from Variant Call Format (VCF) files of 41 accessions in the citrus variant discovery panel and represents the percent of variant positions in the file that were heterozygous in each accession. Group 1 (Citrus, 28 accessions), Group 2 (Citron, 4 accessions),…
Genotype ID	Species	Variety Name	Het calls from Seq	% Heterozygosity	NoCall from Seq	Group
MXL	Citrus aurantifolia Swingle	Mexican lime	2628024	17.44	4842577	1
SSO	Citrus aurantium L.	Sour orange	2714961	15.23	2075827	1
CLM	Citrus clementina hort. ex Tana	Clementine mandarin	1207805	6.30	741438	1
JAM	Citrus jambhiri Lush.	Schaub rough lemon	3211273	19.37	3333197	1
KSH	Citrus kinokuni Hort. ex Tanaka	Mukakukishu (Kinokuni mandarin)	749336	4.28	2416869	1
LSB	Citrus limon L. Burm. f.	Frost nucellar Lisbon lemon	2656909	16.62	3919307	1
BAN	Citrus maxima (Burm.) Merr.	Banpeiyu pummelo	703620	4.29	3510948	1
CPP	Citrus maxima (Burm.) Merr.	Cariappa CM3 pummelo	749164	5.07	5125608	1
CHP	Citrus maxima (Burm.) Merr.	Chandler pummelo	783641	4.94	4053680	1
HUP	Citrus maxima (Burm.) Merr.	Hunan pummelo	604913	4.28	5780738	1
KPP	Citrus maxima (Burm.) Merr.	Kao Phuang pummelo	470080	3.8	7523250	1
LAP	Citrus maxima (Burm.) Merr.	Low acid pummelo	567681	3.82	5043454	1
MBP	Citrus maxima (Burm.) Merr.	Mato Buntan pummelo	693953	4.76	5324111	1
TAP	Citrus maxima (Burm.) Merr.	Tahitian pummelo	785883	4.96	4061901	1
TDP	Citrus maxima (Burm.) Merr.	Thong Dee pummelo	604569	4.85	7437450	1
MIC	Citrus micrantha var.microcarpa Wester	Small-fruited papeda	399030	3.64	8942200	1
KNG	Citrus nobilis Lour.	King mandarin	1495489	8.14	1527462	1
DUN	Citrus paradisi Macf.	Duncan grapefruit	2148459	11.95	1923954	1
TRM	Citrus paradisi Macf.	Triumph grapefruit	2145835	12.42	2624569	1
CLP	Citrus reshni Hort. ex Tanak	Cleopatra mandarin	615342	3.22	786884	1
CSM	Citrus reticulata Blanco	Changsha mandarin	811384	4.80	3048372	1
DNC	Citrus reticulata Blanco	Dancy mandarin (Frost nucellar)	622367	3.85	3738482	1
PKM	Citrus reticulata Blanco	Ponkan mandarin	1024789	5.38	861436	1
SCM	Citrus reticulata Blanco	Sun Chu Sha Kat mandarin	633423	3.32	813007	1
WMM	Citrus reticulata Blanco	W. Murcott mandarin	1247065	6.68	1238611	1
WLM	Citrus reticulata Blanco	Willowleaf mandarin	791813	4.09	539809	1
SWO	Citrus sinensis (L.) Osbeck	Sweet orange	2116742	11.59	1641714	1
SNK	Citrus sunki Hort. ex Tanaka	Sunki mandarin	601625	3.19	1038561	1
TBM	Citrus tachibana Tanaka	Tachibana orange	602010	5.03	7929931	1
UNS	Citrus unshiu Marcovitch	Satsuma mandarin	1373932	7.45	1459065	1
ETH	Citrus medica L.	Ethrog citron	271704	1.84	5115869	2
QIN	Citrus medica L.	Persistent Stigma - OPS citron	373936	2.49	4887646	2
YUN	Citrus medica L.	Yunnanese citron	321104	2.92	8921419	2
BUD	Citrus medica var. sarcodactylis (Hoola van Nooten) Swingl	Buddha's Hand citron (fingered citron)	267659	2.11	7227074	2
HYS	Citrus hystrix D. C.	Mauritius papeda	336360	6.71	14893540	3
ADL	Eremocitrus glauca (Lindl.) Swingle	Australian desert lime	483273	4.87	9981301	3
FOR	Fortunella margarita (Lour.) Swingle	Nagami kumquat	947562	5.88	3785107	3
AFL	Microcitrus australasica var. sanguinia (F. Muell.) Swingle	Red pulp finger lime	1001776	6.87	5316219	3
ARL	Microcitrus australis (A. Cunn. Ex Mudie) Swingle	Australian round lime	936095	6.69	5906389	3
FDT	Poncirus trifoliata (L.) Raf.	Flying Dragon trifoliate	638530	4.4	5405677	3
PON	Poncirus trifoliata (L.) Raf.	Pomeroy trifoliate	728114	5.16	5791087	3

## Sheet: S2 avg heterozygosity HD array
Table S2 Summary table of percent average SNP marker heterozygosity in various groups with Axiom® Citrus HD Genotyping Array. Average percent heterozygous markers was estimated for various citrus groups and relatives using Axiom® Citrus HD Genotyping Array data.
Group	Number of Accessions	Avg Heterozygous Markers (%)	Standard Deviation (%)
Sweet Oranges	15	33	0.04
Grapefruits	10	31	0.66
Misc Hybrids (lemons, limes, etc.)	38	31	7.84
Clementine	4	21	0.05
Satsuma	3	20	0.01
Mandarin Hybrids	44	18	5.02
Papedas	4	12	8.64
Pummelos	19	11	7.64
Mandarins	11	8.3	1.52
Citrons	11	4.3	0.39

## Sheet: S3 avg heterozygosity 56 array
Table S3 Summary table of percent average SNP marker heterozygosity in various groups with Axiom® Citrus Genotyping Array. Average percent heterozygous markers was estimated for various citrus groups and relatives using Axiom® Citrus Genotyping Array data.
Group	Number of Accessions	Avg Heterozygous Markers (%)	Standard Deviation (%)
Sweet oranges	77	36	1.04
Lemons and limes	81	35	7.96
Navel oranges	67	35	0.21
Valencia oranges	25	35	0.08
Blood oranges	17	35	0.05
Grapefruits	34	33	1.98
Trifoliate (Poncirus) Hybrids	44	29	2.52
Clementines	13	24	0.04
Relatives	3	22	1.57
Mandarin Hybrids	132	21	4.71
Satsumas	45	21	0.13
Pummelos	44	8.2	0.88
Mandarins	11	8.1	1.29
Papedas	5	3.6	1.62
Trifoliate (Poncirus)	33	2.6	0.19
Citrons	19	1.4	0.66

## Sheet: S4 196 accessions for HD-PCA
Table S4. 196 unique accessions from CVC for PCA analysis with data from Axiom® Citrus HD Genotyping Array
Sample Name	CRC
Algerian clementine	279
Anseikan pummelo	3979
Arajon pummelo	2596
Avana Tardivo di Ciaculli mandarin	4162
Bakrai mandarin x limetta hybrid	3776
Banpeiyu pummelo	3961
Bergamot sour orange	2881
Berna lemon	3590
Borneo Rangpur lime	2424
Bouquet de Fleurs sour orange	571
Brazilian sour orange	1689
Buddha's Hand citron (fingered citron)	3768
Calamondin	2592
Canton mandarin	3576
Carrizo citrange	2863
Chandler pummelo	3244
Changsha mandarin	3577
Chinese pummelo	1212
Chinotto orange	2375
Citrus amblycarpa	2485
Citrus assamensis	3173
Citrus canaliculata	3565
Citrus depressa	2448
Citrus erythrosa	3292
Citrus excelsa	2316
Citrus excelsa	3765
Citrus halimii	3780
Citrus hanayu	3469
Citrus hongheensis	3797
Citrus hystrix	3103
Citrus keraji	3144
Citrus kharna	3059
Citrus leiocarpa	3147
Citrus longispina winged lime	2320
Citrus lycopersicaformis	3564
Citrus macrophylla	3842
Citrus megaloxycarpa	3241
Citrus miaray	3574
Citrus nippokoreana	3228
Citrus pennivesiculata	2434
Citrus reticulata	3239
Citrus reticulata	3812
Citrus sino-grandis	3148
Citrus succosa	3280
Citrus sudachi	3471
Citrus sunki mandarin	3143
Citrus tachibana	3150
Citrus ujukitsu	3467
Citrus webberii var. Montana	767
Citrus yatsushiro	3466
Cleopatra mandarin	3844
Dancy mandarin	602
Deep Red pummelo	2347
Delta Valencia orange	3963
Diamante citron	3523
Dummett bittersweet orange	2541
Duncan grapefruit	3832
Egami Buntan pummelo	3959
Emerald mandarin	4123
Estes rough lemon	3386
Fairchild mandarin	3559
Florida rough lemon	400
Foothill Lisbon lemon	3836
Fortunella obovata	3475
Fortunella polyandra	3901
Frost nucellar Eureka lemon	3005
Frost nucellar Lisbon lemon	3176
Frost Owari Satsuma	3178
Gold Nugget mandarin	3913
Hiawassie citron	3527
Hirado Buntan pummelo	4122
Huang Yen Man Chieh mandarin	3897
Ichang lemon	1215
Imperial mandarin	4160
Improved Meyer lemon	3737
India lime	2450
Indian citron	661
Indian rough lemon	2544
Interdonato lemon	3593
Iraq lemon hybrid	3492
Italian pink fleshed lemon	2899
Itoshima pummelo	3928
Japansche citroen	2875
Kabosu ichandarin	3943
Kao Pan pummelo	2248
Kao Pan pummelo	2355
Kao Phuang pummelo	2352
Kincy mandarin	4144
King tangor	303
Kinnow mandarin	3021
Kinokuni mandarin	696
Kinokuni mandarin (Mukakukishu)	3887
Kiyomi tangor H-12	3952
Lane Late navel orange	3803
Lapithiotiki lemon	4005
Lemonade lemon	4181
Lima sweet orange	950
Limon Real	2317
Lo Porto lemon	3090
Low thorn Lisbon lemon	NA
Mandarinette	3405
Marsh pink grapefruit	2010
Marsh seedy grapefruit	1565
Mato Buntan pummelo	3945
Mexican lime	1710
Miho Wase satsuma	4047
Milam rough lemon	3396
Millsweet limetta	569
Minneola tangelo	3340
Moanalua pummelo	448
Monachello lemon	3392
Monreal clementine	3773
Moro blood orange	3830
Nagpur orange	3727
Necked mandarin	3738
Nova mandarin	3615
Odorata citron	3655
Okitsu Wase satsuma	3820
Olinda Valencia orange	2750
Olivelands sour orange	2717
Orlando tangelo	3874
Oroval clementine	4010
Ortanique tangor	3368
Oxanthera neo-caledonica	3793
Page tangelo	3616
Palestine sweet lime	1482
Papuan citron	3532
Parent Washington navel orange	1241-A
Philippine pummelo	644
Philippine pummelo hybrid	2343
Pin Shan Kong Yan pummelo	2348
Pineapple sweet orange	3858
Pink pummelo	2246
Pink pummelo	2244
Ponkan mandarin	3848
Pursha lime x Chinotto	3578
Red pummelo	2245
Rex Union grapefruit hybrid	3962
Rhode red Valencia orange	3995
Richard's Special mandarin	3329
Robinson mandarin	3850
Royal grapefruit	248
Ruby orange	3827
Ruvel navel orange	3181
S-1 citron	3878
Sacaton citrumelo	3337
Doblefina blood orange	4000
Santa Barbara Rangpur lime	131
Santa Barbara Rangpur lime	712
Schaub rough lemon	3879
Seedless Kishu	3906
Seedy navel orange	956
Siamese acidless pummelo	2240
Siamese pummelo	2421
Siamese seedless pummelo	640
Sidi Aissa clementine	3988
Siranui dekopan	4113
Smith's Early navel orange	574
Som Keowan mandarin	3752
Som Saa mandarin	3853
South Coast Field Station citron	3546
Spadifora citron	3535
SRA 337 mandarin (US Furr)	4238
Standard sour orange	628
Star Ruby grapefruit	3770
Stowe Red rough lemon	3185
Sun Chu Sha mandarin	4003
Szinkom mandarin	3085
Tango mandarin	4183
Temple tangor	2598
Thong Dee pummelo	3927
Thornless Mexican lime	2683
Tibbetts Parent Washington navel orange	4051
Tien Chieh mandarin	2590
Tim Kat mandarin	2692
Tresca pummelo	302
Triumph grapefruit	297
Troyer citrange	1459
Unnamed citron	3174
Unnamed lemon	3885
Unnamed sweet lemon	3093
US 119 hybrid	3998
USDA 6-15-150 mandarin	4165
Valencia orange Late orange	4077
Valentine grapefruit hybrid	4182
Variegated Pink Fleshed Eureka lemon	2367
W. Murcott Afourer mandarin	3953
Washington Sanguine blood orange	3977
Wild lemon	3300
Wilking mandarin	3020
Willowleaf mandarin	3843
Wincia tangor	4148
Yellow Rind mandarin	3895
Yemen citron	2847
Yunnanese citron	3798
Yuzu	1216

## Sheet: S5 871 CVC accessions for PCA
Table S5. 871 unique accessions from CVC for PCA analysis with Axiom® Citrus Genotyping Array data
Sample Name	CRC
Abhayapuri lime	3762
Ac29 lemon	3920
Addanimma lime	3072
African pummelo	2346
African Shaddock x Rubidoux Trifoliate	3969
Aguzdera satsuma	4090
Ain Taoujdate clementine	4212
Akcay Sekeri sweet orange	3802
Algerian clementine	279
Allen Newman#4 Eureka lemon	3496
Allen Variegated Eureka lemon	3007
Allspice tangelo	4143
Altoona tangor	2792
Amber Eureka lemon	2429
Ambersweet sweet orange	4002
Amoa 8 tangor	4237
Anseikan pummelo	3979
Aoshima satsuma	4066
Apopka navel orange	4151
Arajon pummelo	2596
Arancino lemon	3387
Argentina sweet orange	2802
Argentine trifoliate	3206
Armstrong satsuma	4064
Arrufatina clementine	4184
Asahikan pummelo hybrid	3905
Atmore lemon	4092
Atwood navel orange	3791
Australian navel orange	4175
Australian Red Rangpur lime	2319
Australian trifoliate	3151
Autumn Gold navel orange	4037
Avana Apireno mandarin	4163
Avana Tardivo di Ciaculli mandarin	4162
Aziza sweet orange	3403
Badhri citron hybrid	3723
Bahianinha Araras navel orange	4168
Bahianinha-SRA 513 navel orange	4167
Bahman Persian#1 sweet lime	4174
Bahman Persian#2 sweet lime	4187
Baishaishu Rangpur lime	4129
Bakrai (mandarin x limetta) hybrid	3776
Banokan pummelo	3950
Banpeiyu pummelo	3961
Berna sweet orange	3272
Barnes trifoliate	2554
Barnfield navel orange	4038
Batangas mandarin	3659
Baygold tangelo	4186
Belady mandarin	3363
Benecke trifoliate	3338
Bengal citron hybrid	3055
Beni Hassaku pummelo hybrid	3907
Benoit trifoliate	3547
Benton citrange	3908
Bergamot sour orange	2881
Bergamotto#18 Lisbon lemon	3506
Berna lemon	3590
Bessie sweet orange	245
Bessie sweet orange	1693
Bey navel orange	3406
Bidwells Bar sweet orange	1512
Biondo Comune sweet orange	3866
Biondo Riccio sweet orange	3630
Bishop Red lime	2451
Bitrouni lemon	3265
Bitters C22 citrandarin	4219
Bitters navel orange	4228
Blanca Macetera sweet orange	3898
Blanchard Eureka lemon	3499
Borneo Rangpur lime	2424
Boukhobza blood orange	4156
Bouquet des Fleurs sour orange	571
Bouquetier De Nice sour orange	4157
Bower mandarin	3649
Brazilian sour orange	1689
Bream Tarocco blood orange	4032
Buddha's Hand citron	3768
Burris Valencia orange	2561
C32 citrange	3911
C35 citrange	3912
Cadena Punchosa sweet orange	3246
Cadenera Fina sweet orange	2856
Cadenera sweet orange	3632
Caffin clementine	3987
Calabrese Ovale orange	3921
Calamondin	2592
Calamondin	3656
Calashu mandarin hybrid	2867
California Rojo navel orange	4201
Campbell Valencia orange	3032
Camulos grapefruit	3139
Canton mandarin	3576
Capuchin sweet orange	3245
Cara Cara navel orange orange	3994
Carpenter C54 citrandarin	4220
Carrizo citrange	2863
Carter navel orange	2008
Cascade Eureka lemon	2703
Cascade#1 Eureka lemon	3498
Castelo lime	4062
Catlin Valencia orange	3860
Cecily grapefruit	2014
Cecily grapefruit	3637
Centennial Variegated kumquat	4082
Ceridwen navel orange	4065
Chandler pummelo	3224
Changsha mandarin	3577
Chapman Valencia orange	4229
China 6-15 satsuma	4180
China 6-18 satsuma	4199
China 6-21 satsuma	4213
China 6-22 satsuma	4214
China S-1 satsuma	4158
China S-11 satsuma	4159
China S-12 satsuma	4154
China S-15 satsuma	4178
China S-17 satsuma	4179
China S-2 satsuma	4060
China S-20 satsuma	4198
China S-5 satsuma	4153
China S-8 satsuma	4177
China S-9 satsuma	4061
China Satsuma#3	4115
China Satsuma#6	4088
China Satsuma#7	4089
Chinese pummelo	1212
Chinese pummelo	1224
Chinotto Broadleaf sour orange	4104
Chinotto sour orange hybrid	2375
Chinotto sour orange hybrid	3728
Chinotto sour orange	3857
Chironja grapefruit hybrid	3909
Chironja grapefruit hybrid	4045
Chislett navel orange	4039
Chulo Key lime	4120
Cipo sweet orange	3894
Citradarin trifoliate hybrid	2618
Citradia trifoliate hybrid	1436
Citradia trifoliate hybrid	1437
Citradia trifoliate hybrid	1438
Citraldin trifoliate hybrid	2619
Citrange#1416 citrange	2866
Citrangequat 19-15-7	3259
Citrangor trifoliate hybrid	1447
Citremon trifoliate hybrid	1448
Citremon trifoliate hybrid	1449
Citron Of Commerce citron	3518
Citrumelo	1452
Citrumelo	3348
Citrus amblycarpa	2485
Citrus assamensis	3173
Citrus benikoji	3149
Citrus canaliculata	3565
Citrus depressa	2448
Citrus erythrosa	3292
Citrus excelsa	2316
Citrus excelsa	2892
Citrus excelsa	3765
Citrus funadoko	3274
Citrus grandis pummelo	2453
Citrus hanayu	3469
Citrus hiroshimana hybrid	3275
Citrus hongheensis	3797
Citrus hystrix	432
Citrus hystrix	2454
Citrus hystrix	3103
Citrus intermedia	3474
Citrus keraji	3144
Citrus kharna	3059
Citrus leiocarpa	3147
Citrus limettioides	919
Citrus limettioides	921
Citrus longispina winged lime	2320
Citrus lycopersicaformis	3564
Citrus macrophylla	2446
Citrus macrophylla	3842
Citrus maderaspatana	3225
Citrus megaloxycarpa	3241
Citrus miaray	3574
Citrus myrtifolia	4164
Citrus natsudaidai	3235
Citrus nippokoreana	3228
Citrus obovoidae	3465
Citrus otachibana	3470
Citrus pennivesiculata	2434
Citrus reticulata	3239
Citrus reticulata	3812
Citrus reticulata	3813
Citrus rokugatsu	3473
Citrus rugulosa	3556
Citrus shunkokan	3476
Chinese sweet orange	3814
Citrus sinensis China sweet orange	3933
Citrus sinensis China sweet orange	3934PC
Citrus sino-grandis	3148
Citrus succosa	3280
Citrus sudachi	3471
Citrus sulcata	3257
Citrus sunki mandarin	3143
Citrus tachibana mandarin	3150
Citrus tamurana	3092
Citrus tardiva mandarin	3297
Citrus tengu	3464
Citrus ujukitsu	3467
Citrus volkameriana	3050
Citrus vulgaris sour orange hybrid	760
Citrus webberii var. Montana	767
Citrus yatsushiro mandarin	3466
Citrus yatsushiro mandarin	3880
Citrus yuko	3146
Clausellina satsuma	4012
Clement tangelo	2603
Clementine x Pearl mandarin hybrid	4020
Clementine x Silverhill mandarin hybrid	3731
Cleopatra mandarin	3844
Cluster Sport navel orange	3732
Coarse Valencia orange	1518
Cocktail pummelo hybrid	3555
Cogan navel orange	4050
Cook Eureka lemon	3837
Corona Foothill Eureka lemon	3043
Corpaci lemon	3591
Corrugated Thomson navel orange	1381
Corsican citron	1795
CPB4475 citrumelo	3341
CPB44944A navel orange	3305
CPB44944B navel orange	3306A
CRC343 grapefruit	343
Cuban Shaddock pummelo	1462
Cukurova navel orange	4086
Cunningham citrange	271
Curry sweet orange	3347
Cutter Valencia orange	3030
Dabbe citron hybrid	3190
Daidai sour orange	656
Daisy mandarin	3910
Daisy SL mandarin	4203
Dalandan sweet orange	2373
Dancy Frost mandarin	3026
Dancy Weshart_mandarin	602
Dart North Owari satsuma	4099
Dart South Owari satsuma	4100
Davao papeda hybrid	2427
De Nules clementine	4056
Deep Red pummelo	2347
Delfino blood orange	4114
Delta Valencia orange	3963
Diamante citron	3523
Diller sweet orange	2602
Djerok citron hybrid	2456
Dobashi Beni satsuma	3794
Doblefina blood orange	3152
Doblefina blood orange	4000
Dom Joao Valencia orange	3872
Dr Strong#28 Lisbon lemon	3504
Dream navel orange	3307
Dry navel orange	3354
Dulcia citron	3654
Dummett bittersweet orange	2541
Duncan grapefruit	3832
Dungan satsuma	4101
Dweet tangor	3018
Early tangelo	2560
East Highlands sweet orange	2369
Egami Buntan pummelo	3959
Egyptian lime	2883
Ellendale tangor	3960
Emerald mandarin	4123
Empress mandarin	3613
Encore mandarin	3569
Encore_IR6_mandarin	4204
English Large trifoliate	3548
Entre Fina blood orange	3650
Eremolemon citrus relative hybrid	2439
Espagnole Sans Pepins sweet orange	3249
Estes rough lemon	3386
Eustis limequat	3603
Everglade Lime	2449
Everhard navel orange	4200
Fairchild LS mandarin	4205
Fairchild mandarin	3559
Fallglo mandarin	3990
Faris sweet lemon	2695
Faustrime	2891
Femminello lemon	3500
Femminello Ovale lemon	3388
Femminello Sfusato lemon	3389
Femminello Siracusano 2KR lemon	4166
Feroniella oblata	3510
Fina clementine	4011
Fina Sodea clementine	3999
Finike sweet orange	3870
Fisher navel orange	3135
Fisher navel orange	3645
Flame grapefruit	3993
Fleming's Shaddock pummelo	578
Florida A rough lemon	3385
Florida rough lemon	400
Florida trifoliate	2862
Flying Dragon trifoliate	3330A
Flying Dragon trifoliate	3330B
Foothill Lisbon lemon	3836
Fortune mandarin	3560
Fortunella crassifolia	3818
Fortunella japonica	3237
Fortunella obovata	3475
Fortunella polyandra	3901
Foster Pink grapefruit	1198
Fraser Seville sour orange	4096
Fremont mandarin	3558
Frost Marsh grapefruit	3184
Frost nucellar Eureka lemon	3005
Frost nucellar Lisbon lemon	3176
Frost Nucellar#1 navel orange	3033
Frost Owari satsuma	3178
Frost trifoliate	3484
Frost Valencia orange	3031
Frua mandarin	3022
Fukumoto navel orange	3903
Fulwood navel orange	4112
Furr C-57 citrandarin	4221
Fuya Menuda sweet orange	3787
Fuzzy Valencia orange	1240
Gabbuchinee sour orange hybrid	3079
Galligan Lisbon lemon	3835
Genetic Dwarf grapefruit	3774
Genoa lemon	565
Giant Key lime	4069
Gillemberg navel orange	4192
Gillette navel orange	3017
Glen Citrangedin	3573
Gold Nugget mandarin	3913
Golden Buckeye navel orange	588
Golden Nugget navel orange	1379
Gomiri rough lemon	2557
Goutoucheng sour orange	4004
Granitos sour orange	2715
Gulgul lemon hybrid	4235
H 56 tangor	3096
Haiku B pummelo	3940
Hall grapefruit	3068
Hall grapefruit x Rubidoux trifoliate	3821
Hamlin sweet orange	3862
Hangleson Rangpur lime	3932
Hansen mandarin	4152
Hart's Late Valencia orange	314
Hart's Tardiff Valencia orange	570
Hassaku pummelo hybrid	3942
Henderson Ruby grapefruit	3914
Hernandina clementine	4185
Hiawassie citron	3527
Hill mandarin	3847
Hirado Buntan pummelo	4122
Hiroshima Natsuzabon grapefruit	3904
Hiryu trifoliate	3882
Homosassa sweet orange	292
Homosassa sweet orange	1696
Honey mandarin	3177
Huang Yen Man Chieh mandarin	3897
Hudson Foster grapefruit	3638
Hunan pummelo	1225
Hung Kat mandarin	2331
Ichang lemon	1215
Ichang lemon	1219
Imperial grapefruit	596
Imperial mandarin	4160
Imperial Variegated sweet orange	321
Improved Meyer lemon	3737
India lemon	2322
India lemon	2323
India lime	2450
India lime	3070
Indian citron	138
Indian citron	661
Indian River sweet orange	3859
Indian rough lemon	2544
Indio mandarinquat	3759
Interdonato lemon	3593
Iran lemon	3162
Iraq lemon hybrid	3492
Italian citron	3530
Italian pink fleshed lemon	2899
Itoshima pummelo	3928
Iveriya satsuma	4091
Iwasaki satsuma	4218
Iyo San Ponkan mandarin	4118
Iyomikan tangor	3980
Jacobson trifoliate	3411
Jaffa sweet orange	71
Jamaican Ugli tangelo	4127
Japansche citroen	2875
Jincheng sweet orange	3983
Jochimsen grapefruit	2784
Johnson navel orange	4059
Joppa sweet orange	281
Jullander Khatti rough lemon	4173
Jullundri Khatti rough lemon	3063
Kabosu ichandarin	3943
Kao Pan pummelo	3948
Kao Pan pummelo	2242
Kao Pan pummelo	2243
Kao Pan pummelo	2248
Kao Pan pummelo	2249
Kao Pan pummelo	2349
Kao Pan pummelo	2355
Kao Pan pummelo	2356
Kao Phuang pummelo	2352
Kao Phuang pummelo	3926
Kao Ruan Tia pummelo	2350
Kao Ruan Tia pummelo	2351
Kara mandarin	3019
Karn Lau Yau pummelo	2341
Kawachi Bankan pummelo	3944
Kawano Wase satsuma	1851
Kaweah#1 Lisbon lemon	3010
Keen sour orange	2624
Khalily sweet orange	3251
Khoubs-el-arsa rough lemon	2477
Khoubs-el-arsa rough lemon	2489
Kincy mandarin	4144
King tangor	303
King tangor	3845
Kinkoji Unshiu	3816
Kinnow LS mandarin	4236
Kinnow mandarin	3021
Kinokawa Buntan pummelo	3978
Kinokuni mandarin	696
Kinokuni mandarin (Mukakukishu)	3887
Kirumakki Rangpur lime	4131
Kiyomi tangor H-12	3952
Knorr Rangpur lime	4132
Kobayashi Mikan mandarin	3817
Koethen sweet orange	1106
Konejime sour orange hybrid	3611
Koster tangor	3958
Kryder 28-3 trifoliate	3219
Kryder 5-5 trifoliate	3586
Kryder 55-1 trifoliate	3486
Kryder 60-2 trifoliate	3213
Kryder 8-5 trifoliate	3218
Kryder16-6 trifoliate	3210
Kulobot papeda hybrid	3612
Kulu lemon	3045
Kulu lemon	3487
Kunembo mandarin	3346
Kuno Wase satsuma	4030
Kusaie Rangpur lime	452
Kusner lemon	3194
Lamas lemon	3919
Lane Late navel orange	3803
Lange#3 satsuma	4103
Lapithiotiki lemon	4005
Laranja Cravo Ponkan mandarin	2893
Laranja Selecta sweet orange	1045
Laranja Selecta sweet orange	3754
Lee mandarin	3851
Lemelo pummelo hybrid	1481
Lemelo pummelo hybrid	1775
Lemonime lime hybrid	2459
Leng navel orange	3808
Lima sweet orange	950
Limau Matu Susu citron hybrid	3755
Limoneira 8A IR1 lemon	NA
Limoneira 8A Lisbon lemon	3501
Limonero Fino 95 lemon	4126
Limonero Fino lemon	3970
Limonero Messina lemon	4121
Limonette De Marrakech	3989
Limonreal lime	2317
Limoui Sangui Rangpur lime	3200
Lo Porto lemon	3090
Louisiana Early satsuma	4225
low-thorn Lisbon lemon	NA
Lue Gim Gong Valencia orange	3025
Lumina lemon hybrid	3925
Lunario lemon	3159
Lupe Lisbon lemon	3013
Macetera sweet orange	3871
Madam Vinous sweet orange	3861
Malta blood orange	4085
Maltese Oval navel orange	274
Mandarinette	3405
Mandarin Sanguine mandarin	3367
Mapo tangelo	4222
Marisol clementine	4055
Marks trifoliate	3588
Marlow tangelo	4145
Marr's Early sweet orange	3865
Marsh pink grapefruit	2010
Marsh seedy grapefruit	1565
Mary Ellen sweet lime	4053
Mato Buntan pummelo	3945
Mazoe rough lemon	1222
McEwen satsuma	4098
Mcfadden navel orange	609
Mediterranean sweet orange	4176
Meiwa kumquat	1471
Melogold grapefruit	3764
Mency tangor	3183
Mesero lemon	3892
Messina lemon	3009
Mexican citron	3531
Mexican lime	1710
Michal mandarin	4049
Microcitrus x P. trifoliata	3566
Midknight Valencia orange	3955
Miho Wase satsuma	4047
Milam lemon	3396
Millsweet limetta	569
Minneola tangelo	3340
Mitha Tulia limetta	3051
Miyagawa satsuma	4074
Miyamoto satsuma	4216
Miyauchi Iyo tangor	3946
Moanalua pummelo	448
Moli Kurikuri pummelo hybrid	579
Monachello lemon	3392
Monoembryonic trifoliate	3888
Monreal clementine	3773
Monroe Lisbon lemon	3839
Moro blood orange	3830
Morton citrange	1463
Morton citrange	2748
Murcott mandarin	3846
Myrtifolia sour orange	3290
Nagpur mandarin	3727
Nakhon Chaisi pummelo	2353
Nansho Daidai sour orange	2588
Navelate navel orange	4022
Navelencia navel orange	287
Navelina navel orange	4015
Necked mandarin	3738
Nepolitana satsuma	3848
New Zealand Lemonade	4181
Newhall navel orange	3014
New Zealand grapefruit	2381
New Zealand grapefruit	3769
Nicaraguan lemon	3841
Nichinan Ichigo satsuma	4217
Nicholson navel grapefruit	3398
Nippon orangequat	3360
Nissv E mandarin hybrid	3965
Nour clementine	4057
Nova IR10 mandarin	4206
Nova mandarin	3615
Novelty x Ellendale mandarin hybrid	3956
Odorata citron	3655
Okitsu Wase satsuma	3820
Old Indian lemon	4211
Old Line Eureka lemon	4094
Olinda McEwen Valencia orange	4230
Olinda Mulholland Valencia orange	4231
Olinda Valencia orange	2750
Olivelands sour orange	2717
Olivelands sweet orange	3863
Olympic Gold navel orange	4209
Orange A Feuilles Lachiniees sweet orange	4202
Orange De Nice sweet orange	3624
Orange Of Heaven acidless sweet orange	371
Orban lemon hybrid	4140
Orlando bittersweet sour orange	1588
Orlando tangelo	3874
Oroblanco grapefruit hybrid	3602
Orogold sour orange hybrid	693
Oroval clementine	4010
Ortanique tangor	3368
Otaheite mandarine hybrid	2709
Ovale sweet orange	3625
Oxanthera neo-caledonica	3793
P. trifoliata	4006
P. trifoliata	4007
P. trifoliata	4009
Paak Ling Mung lemon hybrid	3193
Page tangelo	3616
Palestine sweet lime	1482
Palmer navel orange	4013
Palmer navel orange	3964
Pan Dan pummelo	2752
Papuan citron	3532
Paradise navel orange	2853
Paraguay bittersweet sour orange	660
Parent Washington navel orange	1241-A
Parent Washington navel orange	1241-B
Parson Brown sweet orange	3873
Parson's Special mandarin	300
Pauthel pummelo	3949
Pearl tangelo	2849
Pehrson#3 Valencia orange	4196
Pehrson#4 Valencia orange	4197
Pera sweet orange	3864
Perao Valencia orange	3599
Peretta lemon hybrid	3924
Perlis#1 grapefruit	3886
Perlis#2 grapefruit	3883
Perrine lemon hybrid	2458
Philippine Calamondin	3073
Philippine citron	3533
Philippine pummelo	644
Philippine pummelo hybrid	2343
Philippine Rangpur lime	2318
Pin Shan Kong Yan pummelo	2348
Pineapple sweet orange	3858
Pink pummelo	2244
Pink pummelo	2246
Pixie mandarin	3568
Pollock T4 navel orange	4193
Pomelit pummelo hybrid	4026
Pomeroy trifoliate	1717
Pomona sweet lemon	4068
Ponderosa lemon hybrid	294
Pong Yau pummelo	2342
Ponkan mandarin	3849
Poona Rangpur lime	4135
Poona Srirampur Rangpur lime	4136
Powell navel orange	4040
Precoce De Valence sweet orange	3373
Primofiore lemon	3491
Prior Lisbon lemon	3505
Procimequat kumquat hybrid	3295
Procimequat X Clymenia	4109
Puma pummelo hybrid	3941
Pursha lime x Chinotto	3578
Rangpur lime x Troyer citrange	3997
Ray Ruby grapefruit	3915
Red Aranyan pummelo	2608
Red pummelo	2245
Red pummelo	2338
Redblush grapefruit	2850
Reed Marsh grapefruit	3128
Reinking pummelo	3805
Rex Union grapefruit hybrid	3962
Rhode Red Valencia orange	3995
Ricalate navel orange	4058
Rich 16-6 trifoliate	3485
Richard's Special mandarin	3329
Richard's Special mandarin	4117
Ricote lemon	3893
Rio Farms Vaniglia acidless sweet orange	4128
Rio Grande lemonquat	4097
Rio Grande navel orange	3315
Rio Red grapefruit	3916
Road 164 satsuma	4102
Robertson navel orange	4023
Robinson mandarin	3850
Robyn navel orange	4063
Rocky Hill navel orange	4232
Roeding's Pink pummelo	1208
Rohde navel orange	4084
Rojo Blanco pummelo hybrid	4029
Rosenberger Lisbon lemon	3840
Ross Eureka lemon	3838
Rotuma Island sweet orange	3867
Royal grapefruit	248
Rubidoux mandarin	4031
Rubidoux pummelo	4028
Rubidoux sour orange	3855
Rufert A sweet orange	4141
Unnamed rough lemon	3060
Rusk citrange	301
Rusk citrange	1441
Ruvel navel orange	3181
Ruvel-nucellar navel orange	4142
S-1 citron	3878
S281 citrangelo	3552
S302 citranguma	3415
Sacaton citrumelo	3337
Sacaton citrumelo	3414
Sacaton citrumelo	3417
Sacaton tangelo	2609
Sacaton tangelo	3331
Salustiana sweet orange	3868
Sampson tangelo	2418
San Jacinto tangelo	2011
San Marino Valencia orange	2689
Sanford citrange	276
Sanguine Gross Ronde blood orange	3401
Sanguinelli blood orange	3828
Sanguinello a Pignu blood orange	3829
Santa Barbara Rangpur lime	131
Santa Barbara Rangpur lime	712
Santa Barbara tangelo	4073
Santa Teresa lemon	3894
Sarah sweet orange	3584
Sarawak pummelo	4042
Sathgudi sweet orange	3083
Savage citrange	275
Scarlet Emperor Ponkan mandarin	3226
Schaub rough lemon	3879
Secret Garden navel orange	4194
Seedless Kishu mandarin	3906
Seedless lemon	3001
Seedless Valencia orange	2776
Seedy navel orange	65
Selma satsuma	4119
Seminole tangelo	2604
Seville sour orange	3856
Sexton tangelo	2543
Shaddock x St Michael orange pummelo hybrid	42
Shambar grapefruit	3831
Shamouti sweet orange	3746
Shirokolistvennyi satsuma	4091
Siamelo tangelo	2586
Siamese Acidless pummelo	2240
Siamese pummelo	2421
Siamese seedless pummelo	640
Sicily citron	3534
Sidi Aissa clementine	3988
Silverhill satsuma	4072
Sinton Citrangequat	3642
Siranui dekopan	4113
Skaggs Bonanza navel orange	3971
Small Leaf trifoliate	4017
Smith Red blood orange	4093
Smith's Early navel orange	574
Smooth Flat Seville sour orange	4079
Sniff acidless Rangpur lime	2484
Soghi lime	4130
Soh Himtra mandarin	4095
Soh Long lemon hybrid	3199
Soh Niamtra mandarin	3260
Soh Niangrang papeda hybrid	3203
Soh Synteng lemon hybrid	3216
Solid Scarlet mandarin	3328
Som Kaeo mandarin	3852
Som Keowan mandarin	3752
Som Saa mandarin	3853
sour pummelo	3066
South African rough lemon	2325
South Coast Field Station citron	3546
Spadifora citron	3535
Spanish sweet orange x P trifoliata	3336
Spring navel orange	4024
SRA337 mandarin (US Furr)	4238
SRA63 clementine	4076
SRA92 clementine	4052
Srirampur Rangpur lime	4137
St.Michael Paperrind sweet orange	591
Standard sour orange	628
Star Ruby grapefruit	3770
Star sweet orange	366
Stow#20 sour orange	2192
Stow#7 Key lime	2188
Stowe red rough lemon	3185
Sue Linda Temple tangor	3810
Suisho Buntan pummelo	3947
Sukega grapefruit hybrid	4149
Summer Gold navel orange	4041
Sun Chu Sha mandarin	4003
Sunburst mandarin	3809
Sunrise tangelo	2606
Sunshine pummelo	2236
Sunshine tangelo	2788
Unnamed sweet lemon	3093
sweet pummelo	3067
Swingle citrumelo	3767
Swingle citrumelo	3771
Szinkom mandarin	3085
Tahiti sweet orange	3869
Tahitian Pummelo x Star Ruby grapefruit hybrid	3781
Tango mandarin	4183
Tankan tangor	2224
Tankan tangor	3875
Tarocco#7 blood orange	3596
Tau Yau pummelo	2583
Tavares limequat	4048
Taylor Eureka lemon	4014
Taylor trifoliate	3571
Temple tangor	2598
Temple x Dancy mandarin hybrid	4021
Texas trifoliate	2861
Thermal Tarocco blood orange	4018
Thomasville citrangequat	1440
Thomson navel orange	969
Thomson navel orange	983
Thong Dee pummelo	3927
Thong Dee pummelo	4027
Thornless Mexican lime	2683
Thornton tangelo	2013
Tibbets Washington navel orange	4051
Tien Chieh mandarin	2376
Tien Chieh mandarin	2590
Tim Kat mandarin	2692
Tosu sour orange hybrid	3607
Towne F trifoliate	3572
Tresca pummelo	302
Trifeola trifoliate hybrid	3954
Triumph grapefruit	297
Trovita sweet orange	3182
Troyer citrange	1459
Tuningmeng Rangpur lime	4139
Tunisian sour orange	2438
UCR Early navel orange	4087
Ueno satsuma	4223
Ugli tangelo	2780
Ugli tangelo	4171
Unnamed lemon hybrid	3172
Unnamed citron	3174
Unnamed India sour orange hybrid	3175
Unnamed kumquat hybrid	1044
Unnamed lemon	3885
Unnamed lemon hybrid	3154
Unnamed lemon hybrid	3748
Unnamed sweet lemon	3093
Unnamed sweet lime	363
Unnamed sweet orange hybrid	648
Unnnamed lemon hybrid	3155
US 119 hybrid	3998
USDA 1-77-19 tangelo (US Seedless Surprise)	4208
USDA 6-15-150 mandarin	4165
USDA 88-2 mandarin hybrid	3991
USDA 88-3 mandarin hybrid	3992
USDA trifoliate	1498
Uvalde citrange	2865
Vaccaro blood orange	3242
Vaccaro blood orange	3627
Vaniglia Sanguigno acidless sweet orange	3801
Valencia Late sweet orange	4077
Valentine pummelo hybrid	4182
Vangasay 807 rough lemon	3996
Variegated Calamondin	3087
Variegated Cara Cara navel orange	4207
Variegated Eureka lemon	599
Variegated navel orange	1203
Variegated Pink Fleshed Eureka lemon	2367
Variegated sour orange	622
Variegated Valencia orange	4001
Verna sweet orange	3807
Villafranca lemon	280
Villafranca lemon	390
W. Murcott Afourer mandarin	3953
Warren Limequat	3069
Warren Marsh grapefruit	4150
Washington Sanguine blood orange	3977
Washington seedy navel orange	956
Webber tangelo	2746
Webber Fawcett#22 trifoliate	2552
Webber Shaddock pummelo	4233
Weirick acidless Rangpur lime	1684
Wekiwa tangelo	2012
Werley Valencia orange	3339
West Indian lime	1813
Wetumpka sweet orange	3550
Wheeny grapefruit	2885
Whitley navel orange	4195
Whitney Marsh grapefruit	3804
Wiffen navel orange	4083
Wild lemon	3300
Wilking mandarin	3020
Willial tangelo	4147
Williams tangelo	2787
Willowleaf mandarin	3843
Wincia tangor	4148
Workman navel orange	3320
X639 trifoliate hybrid	3957
Xianfengcheng sweet orange	3982
Xie Shan satsuma	4081
Xinhuicheng sweet orange	3985
Xuegan sweet orange	3984
Yalaha tangelo	2559
Yamaguchi trifoliate	3412
Yellow Rind mandarin	3895
Yemen citron	2847
Yen Ben Lisbon lemon	4067
Yuma citrange	3205
Yuma Ponderosa lemon	3488
Yunnanese citron	3798
Yuzu	1216
Zhuluan sour orange	3930
Zhuluan sour orange	3981
#22 trifoliate	4172

## Sheet: S6 probe conversion filters
Table S6. Filters applied by Affymetrix™ bioinformatics team for in-silico analysis to predict variant to probe conversion performance.
Affymetrix™ in-silico analysis included following filters:
duplicate count to assess the number of instances where 24 bases on each side of the SNP match other sequences in the list
poly count to assess the number of instances where 24 bases on each side of SNP match other sequences in the list but the alleles differ
forward/reverse P-convert to assess the expected probability of conversion based on the forward strand of the sequences
forward/reverse repetitive to assess whether or not the 16-mer hit count exceeds threshold
forward/reverse wobble count to assess the number of interfering polymorphisms within 24 bases
forward/reverse wobble distance to assess the distance to the nearest interfering the polymorphism
forward/reverse buildable to assess whether or not a probe can be built from the forward strand
A marker/forward/reverse is recommended if
	P-convert > 0.6
	No wobbles
	Poly count =0
	A marker/forward/reverse is not recommended if
	Duplicate count > 0
	P-convert < 0.4
	Wobble distance < 21
	Wobble count >= 3
A marker/forward/reverse is not possible
	If a probe cannot be built to interrogate the SNP in that direction
All other markers are considered neutral

## Sheet: S7 254 CVC accessions
Table S7 Accessions in Axiom® Citrus HD Genotyping Array validation panel. 254 genomic DNA samples from CVC were selected as a validation panel to
to be screened with Axiom® Citrus HD Genotyping Array for performance assessment of SNPs and the array. Notes explained at end of file.
Sample Name	CRC	Genus and Species	Group	Notes
Aegle marmelos	3140	Aegle marmelos (L.) Corrêa	3	<80% QC CR
Algerian clementine	279	C. clementina	1
Anseikan pummelo	3979	C. maxima	1
Arajon pummelo	2596	C. maxima	1
Australian trifoliate	3151	P. trifoliata	3	Failed QC
Avana Tardivo di Ciaculli mandarin	4162	C. deliciosa Ten.	1
Bakrai (mandarin x limetta) hybrid	3776	Hyb	1
Balsamocitrus daweii	3514	B. daweii Stapf	3	<80% QC CR
Banpeiyu pummelo	3961	C. maxima	1
Bergamot sour orange	2881	C. aurantium	1
Berna lemon	3590	C. limon	1
Borneo Rangpur lime	2424	(C. micrantha x C. medica)	1
Bouquet de Fleurs sour orange	571	C. aurantium	1
Brazilian sour orange	1689	C. aurantium	1
Buddha's Hand citron	3768	C. medica	2
Calamondin	2592	Hyb	1
Canton mandarin	3576	C. reticulata	1
Carrizo citrange	2863	(C. sinensis x P. trifoliata)	1
Chandler pummelo	3244	C. maxima	1
Changsha mandarin	3577	C. reticulata	1
Chinese pummelo	1212	C. maxima	1
Chinotto sour orange hybrid	2375	C. aurantium	1
Christiansen trifoliate	3345	P. trifoliata	3	Failed QC
Citrus amblycarpa	2485	C. amblycatpa	1
Citrus assamensis	3173	C. assamensis	1
Citrus canaliculata	3565	C. canaliculata	1
Citrus depressa	2448	C. depressa	1
Citrus erythrosa	3292	C. erythrosa	1
Citrus excelsa	2316	C. excelsa	1
Citrus excelsa	3765	C. excelsa	1
Citrus grandis	2340	C. grandis	1	Failed QC
Citrus halimii	3780	C. halimii	1
Citrus hanayu	3469	C. hanayu	3
Citrus hongheensis	3797	C. hongheensis	3	Failed QC
Citrus hystrix	3103	C. hystrix	3	Failed QC
Citrus hystrix, Cabuyao	432	C. hystrix, Cabuyao	3	Failed QC
Citrus ichangensis	2327	C. ichangensis	3	Failed QC
Citrus ichangensis	3931	C. ichangensis	3	Failed QC
Citrus keraji	3144	C. keraji	1
Citrus kharna	3059	C. kharna	1
Citrus latipes	3052	C. latipes	3	Failed QC
Citrus leiocarpa	3147	C. leiocarpa	1
Citrus longispina winged lime	2320	C. longispina winged lime	1
Citrus lycopersicaformis	3564	C. lycopersicaformis	1
Citrus macrophylla	3842	C. macrophylla	1
Citrus megaloxycarpa	3241	C. megaloxycarpa	2
Citrus miaray	3574	C. miaray	1
Citrus microcarpa	3605	C. microcarpa	3	Failed QC
Citrus nippokoreana	3228	C. nippokoreana	1
Citrus pennivesiculata	2434	C. pennivesiculata	1
Citrus reticulata	3239	C. reticulata	1
Citrus reticulata	3812	C. reticulata	1
Citrus sino-grandis	3148	C. sino-grandis	1
Citrus succosa	3280	C. succosa	1
Citrus sudachi	3471	C. sudachi	3
Citrus sunki mandarin	3143	C. sunki mandarin	1
Citrus tachibana	3150	C. tachibana	1
Citrus ujukitsu	3467	C. ujukitsu	1
Citrus webberii	1455	C. webberii	3	Failed QC
Citrus webberii var. Montana	767	C. webberii var. Montana	3
Citrus yatsushiro	3466	C. yatsushiro	1
Oroval clementine	4010	C. clementina	1
Sidi Aissa clementine	3988	C. clementina	1
Monreal clementine	3773	C. clementina	1
Cleopatra mandarin	3844	C. reticulata	1
Dancy mandarin	602	C. reticulata	1
Deep Red pummelo	2347	C. maxima	1
Delta Valencia orange	3963	C. sinensis	1
Diamante citron	3523	C. medica	2
Dummett bittersweet orange	2541	C. aurantium (C. maxima x C. reticulata)	1
Duncan grapefruit	3832	(C. maxima x C. sinensis)	1
Egami Buntan pummelo	3959	C. maxima	1
Emerald mandarin	4123	C. reticulata	1
Eremocitrus glauca	3463	E. glauca	3
Estes rough lemon	3386	(C. reticulata x C. medica)	1
Fairchild mandarin	3559	C. reticulata	1
Florida rough lemon	400	(C. reticulata x C. medica)	1
Foothill Lisbon lemon	3836	C. limon	1
Fortunella crassifolia	1471	F. crassifolia	3	Failed QC
Fortunella hindsii	3789	F. hindsii	3	Failed QC
Fortunella hindsii	3790	F. hindsii	3	Failed QC
Fortunella japonica	3237	F. japonica	3	Failed QC
Fortunella obovata	3475	F. obovata	3	Failed QC
Fortunella polyandra	3901	F. polyandra	3	Failed QC
Frost nucellar Eureka lemon	3005	C. limon	1
Frost nucellar Lisbon lemon	3176	C. limon	1
Frost Owari satsuma	3178	C. unshiu	1
Gold Nugget mandarin	3913	C. reticulata	1
Hiawassie citron	3527	C. reticulata	1
Hirado Buntan pummelo	4122	C. maxima	1
Huang Yen Man Chieh mandarin	3897	C. reticulata	1
Ichang lemon	1215	Hyb	1
Imperial mandarin	4160	C. reticulata	1
Improved Meyer lemon	3737	C. limon	1
India lime	2450	(C. reticulata x C. medica)	1
Indian citron	661	C. medica	2
Indian rough lemon	2544	(C. reticulata x C. medica)	1
Interdonato lemon	3593	C. limon	1
Iraq lemon hybrid	3492	Hyb	1
Italian pink fleshed lemon	2899	C. limon	1
Itoshima pummelo	3928	C. maxima	1
Japansche citroen	2875	C. limonia Osbeck	1
Kabosu ichandarin	3943	C. sphaerocarpa	3
Kao Pan pummelo	2248	C. maxima	1
Kao Pan pummelo	2355	C. maxima	1
Kao Phuang pummelo	2352	C. maxima	1
Kincy mandarin	4144	C. reticulata	1
King tangor	303	Hyb	1
Kinnow mandarin	3021	C. reticulata	1
Kinokuni mandarin	696	C. reticulata	1
Kinokuni mandarin (Mukakukishu)	3887	C. reticulata	1
Kiyomi tangor H-12	3952	Hyb	1
Lane Late navel orange	3803	C. sinensis	1
Lapithiotiki lemon	4005	C. limon	1
Lemonade lemon	4181	C. limon	1
Lima sweet orange	950	C. sinensis	1
Limon Real	2317	C. limon	1
Little-leaf trifoliate	4008	P. trifoliata	3	Failed QC
Lo Porto lemon	3090	C. limon	1
Low thorn Lisbon lemon	NA	C. limon	1
Mandarinette	3405	C. reticulata	1
Marsh pink grapefruit	2010	(C. maxima x C. sinensis)	1
Marsh seedy grapefruit	1565	(C. maxima x C. sinensis)	1
Marumi (SRA 489)	4125	F. japonica	1	Failed QC
Mato Buntan pummelo	3945	C. maxima	1
Mexican lime	1710	(C. micrantha x C. medica)	1
Microcitrus warburgiana	3782	M. warburgiana	3	Failed QC
Microcitrus australasica	3671	M. australasica	3	Failed QC
Microcitrus australasica	3672	M. australasica	3	Failed QC
Microcitrus australasica var. Sanguinea	1484	M. australasica var. Sanguinea	3	Failed QC
Microcitrus virgata	1485	M. virgata	3	Failed QC
Miho Wase satsuma	4047	C. unshiu	1
Milam rough lemon	3396	(C. reticulata x C. medica)	1
Millsweet limetta	569	Hyb	1
Minneola tangelo	3340	Hyb	1
Moanalua pummelo	448	C. maxima	1
Monoembryonic trifoliate	3888	P. trifoliata	3	Failed QC
Moro blood orange	3830	C. sinensis	1
Murraya koenigii	3165	M. koenigii	3	<80% QC CR
Murraya paniculata	1637	M. paniculata	3
Nagami kumquat	3877	F. margarita	3	Failed QC
Nagpur orange	3727	C. reticulata	1
Necked mandarin	3738	C. reticulata	1
Nova mandarin	3615	C. reticulata	1
Odorata citron	3655	C. medica	2
Okitsu Wase satsuma	3820	C. unshiu	1
Olinda Valencia orange	2750	C. sinensis	1
Olivelands sour orange	2717	C. aurantium	1
Orlando tangelo	3874	Hyb	1
Ortanique tangor	3368	Hyb	1
Oxanthera neo-caledonica	3793	O. neo-caledonica	3
Page tangelo	3616	Hyb	1
Palestine sweet lime	1482	Hyb	1
Papuan citron	3532	C. medica	2
Parent Washington navel orange	1241A	C. sinensis	1
Parent Washington navel orange	1241B	C. sinensis	1
Philippine pummelo	644	C. maxima	1
Philippine pummelo hybrid	2343	Hyb	1
Pin Shan Kong Yan pummelo	2348	C. maxima	1
Pineapple sweet orange	3858	C. sinensis	1
Pink pummelo	2246	C. maxima	1	Failed QC
Pink pummelo	2244	C. maxima	1
Pomeroy trifoliate	1717	P. trifoliata	3	Failed QC
Ponkan mandarin	3848	C. reticulata	1
Pursha lime x Chinotto	3578	Hyb	1
Red pummelo	2245	C. maxima	1
Rex Union grapefruit hybrid	3962	Hyb	1
Rhode Red Valencia orange	3995	C. sinensis	1
Rich 16-6 trifoliate	3485	P. trifoliata	3	Failed QC
Richard's Special mandarin	3329	C. reticulata	1
Robinson mandarin	3850	C. reticulata	1
Royal grapefruit	248	(C. maxima x C. sinensis)	1
Ruby orange	3827	C. sinensis	1
Ruvel navel orange	3181	C. sinensis	1
S-1 citron	3878	C. medica	2
Sacaton citrumelo	3337	(C. paradisi x P. trifoliata)	3
Doblefina blood orange	4000	C. sinensis	1
Santa Barbara Rangpur lime	131	(C. reticulata x C. medica)	1
Santa Barbara Rangpur lime	712	(C. reticulata x C. medica)	1
Schaub rough lemon	3879	(C. reticulata x C. medica)	1
Seedless Kishu	3906	C. unshiu	1
Severinia buxifolia	1492	S. buxifolia	3	Failed QC
Siamese acidless pummelo	2240	C. maxima	1
Siamese pummelo	2421	C. maxima	1
Siamese seedless pummelo	640	C. maxima	1
Simmons trifoliate	3549	P. trifoliata	3	Failed QC
Siranui dekopon	4113	C. reticulata	1
Smith's Early Naval orange	574	C. sinensis	1
Som Keowan mandarin	3752	C. reticulata	1
Som Saa mandarin	3853	C. reticulata	1
South Coast Field Station citron	3546	C. medica	2
Spadifora citron	3535	C. medica	2
SRA 337 mandarin (US Furr)	4238	C. reticulata	1
Standard sour orange	628	C. aurantium	1
Star Ruby grapefruit	3770	(C. maxima x C. sinensis)	1	Failed QC
Stowe red rough lemon	3185	C. limon	1
Sun Chu Sha mandarin	4003	C. reticulata	1
Szinkom mandarin	3085	C. reticulata	1
Tahitian pummelo	3806	C. maxima	1	Failed QC
Tango mandarin	4183	C. reticulata	1
Temple tangor	2598	Hyb	1
Thong Dee pummelo	3927	C. maxima	1
Thornless Mexican lime	2683	(C. micrantha x C. medica)	1
Tibbetts Parent Washington navel orange	4051	C. sinensis	1
Tien Chieh mandarin	2590	C. reticulata	1
Tim Kat mandarin	2692	C. reticulata	1
Tresca pummelo	302	C. maxima	1
Triumph grapefruit	297	(C. maxima x C. sinensis)	1
Troyer citrange	1459	(C. sinensis x P. trifoliata)	3
Unnamed citron	3174	C. medica	2
Unnamed lemon	3885	C. limon	1
Unnamed sweet lemon	3093	Hyb	1
US 119 hybrid	3998	Hyb	1
USDA 6-15-150 mandarin	4165	C. reticulata	1
Valencia orange Late orange	4077	C. sinensis	1
Valentine grapefruit hybrid	4182	Hyb	1
Valentine x Kishu #1	NA	Hyb	1
Valentine x Kishu #2	NA	Hyb	1
Valentine x Kishu #4	NA	Hyb	1
Variegated Pink Fleshed Eureka lemon	2367	C. limon	1
W. Murcott Afourer mandarin	3953	C. reticulata	1
Washington Sanguine blood orange	3977	C. sinensis	1
Washington seedy navel orange	956	C. sinensis	1
Wild lemon	3300	C. limon	1
Wilking mandarin	3020	C. reticulata	1
Willowleaf mandarin	3843	C. reticulata	1
Wincia tangor	4148	Hyb	1
Yellow Rind mandarin	3895	C. reticulata	1
Yemen citron	2847	C. medica	2
Yunnanese citron	3798	C. medica	2
Yuzu	1216	Hyb	1
#22 trifoliate	4172	P. trifoliata	3	Failed QC
Citrus pennivesiculata	2434	C. pennivesiculata	1	sample duplicate
Citrus ujukitsu	3467	C. ujukitsu	1	tree duplicate
Monreal clementine	3773	C. clementina	1	sample duplicate
Cleopatra mandarin	3844	C. reticulata	1	sample duplicate
Duncan grapefruit	3832	(C. maxima x C. sinensis)	1	sample duplicate
Duncan grapefruit	3832	(C. maxima x C. sinensis)	1	tree duplicate
Fairchild mandarin	3559	C. reticulata	1	sample duplicate
Marsh pink grapefruit	2010	(C. maxima x C. sinensis)	1	tree duplicate
Parent Washington navel orange	1241A	C. sinensis	1	sample duplicate
Parent Washington navel orange	1241A	C. sinensis	1	tree duplicate
Parent Washington navel orange	1241B	C. sinensis	1	tree duplicate
Philippine pummelo	644	C. maxima	1	tree duplicate
Pin Shan Kong Yan pummelo	2348	C. maxima	1	tree duplicate
Pink pummelo	2244	C. maxima	1	sample duplicate
Pink pummelo	2244	C. maxima	1	tree duplicate
Pomeroy trifoliate	1717	P. trifoliata	3	sample duplicate
Red pummelo	2245	C. maxima	1	tree duplicate
Rich 16-6 trifoliate	3485	P. trifoliata	3	sample duplicate
Royal grapefruit	248	(C. maxima x C. sinensis)	1	tree duplicate
Siamese pummelo	2421	C. maxima	1	sample duplicate
Star Ruby grapefruit	3770	(C. maxima x C. sinensis)	1	sample duplicate
Sun Chu Sha mandarin	4003	C. reticulata	1	tree duplicate
Failed QC indicates a sample which failed QC on either or both HD arrays
samples listed as "< 80% QC CR" had call rates below an absolute threshold of 80
sample duplicate indicates accession for which the same DNA sample was analyzed twice (technical replicate)
tree duplicate indicates accession for which separate DNA samples were extracted and analyzed from different trees of the same accession (biological replicate)

## Sheet: S8 Trio analysis
Table S8. Families used in mendelian trio analysis to assess Mendelian inheritance from parents to off-spring for SNP validation.
(a) Total of 7 families and 10 trios used for assessment of mendelian inheritance to validate SNPs represented on the Axiom® Citrus HD Genotyping Array.
(b) Total of 9 families and 9 trios were used for assessment of mendelian inheritance to validate SNPs represented on the Axiom® Citrus Genotyping array.
(a)
Family	Parent-Female	Parent-Male	Offspring
F01-a	Algerian_clementine_279	Orlando_tangelo_3874	Fairchild_mandarin_3559
F01-b	Algerian_clementine_279	Orlando_tangelo_3874	Nova_mandarin_3615
F02	Duncan_grapefruit_3832	Dancy_Weshart_602	Minneola_tangelo_3340
F03	Parent Washington navel orange 1241A	Pomeroy trifoliate 1717	Troyer citrange 1459
F04	King tangor 303	Willowleaf mandarin 3843	Kinnow 3021
F05	Siamese acidless 2240	Ruby orange 3827	Raspberry jam 4X
F06	Wilking mandarin 3020	Kincy mandarin 3144	Gold Nugget mandarin 3913
F07-a	Valentine pummelo hybrid 4182	Seedless Kishu 3906	Valentine x Kishu #1
F07-b	Valentine pummelo hybrid 4182	Seedless Kishu 3906	Valentine x Kishu #2
F07-c	Valentine pummelo hybrid 4182	Seedless Kishu 3906	Valentine x Kishu #4
(b)
Family	Parent-Female	Parent-Male	Offspring
F01	Algerian clementine 279	Orlando tangelo 3874	Fairchild mandarin 3559
F02	African pummelo 2346	Rubidoux trifoliate 838	African Shaddock x Rubidoux citrumelo 3969
F03	Sydney hybrid microcitrus hybrid	Flying Dragon trifoliate 3330A	Microcitrus x trifoliate trifoliate hybrid 3566
F04	Siamese Acidless pummelo 2240	Frua mandarin 3022	Cocktail pummelo hybrid 3555
F05	West Indian lime 1813	Marumi SRA489 kumquat 4125	Eustis limequat
			kumquat hybrid 3603
F06	Frost Lisbon 3176	Washington Songuine 3977	Orban lemon 4140
F07	Wilking mandarin 3020	Siamese Acidless pummelo 2240	13D-5-10
F08	Fortune mandarin 3560	Fairchild mandarin 3559	RS99.201-21
F09	Chandler pummelo 3224	Pomeroy trifoliate 1717	RR86-10-99

## Sheet: S9 mendelian inheritance error
Table S9. Mendelian inheritance error calculated for SNP validation with Axiom® Citrus HD Genotyping Array and Axiom® Citrus Genotyping Array
a) Genotyping calls with Axiom® Citrus HD Genotyping Array were used to assess mendelian inheritance (MI) error from parents to off-spring in 10 trios. MI error was calculated separately for Axiom® Citrus HD Genotyping Array AX1 and AX2 by Affymetrix™ bioinformatics team.
(b) Genotyping calls with Axiom® Citrus Genotyping Array were used to assess mendelian error from parents to off-spring in 9 trios involving members of more diverse crosses. Number of loci that are inconsistent with mendelian inheritance was calculated with plink v1.9 (https://www.cog-genomics.org/plink/1.9/basic_stats) using 53,206 PHR loci. No calls are counted as Mendelian error, partly explai…
(a)
Axiom® Citrus HD	Offspring	Parent-Male	Parent-Female	MI Error
Genotyping Array
AX1	Fairchild mandarin 3559	Orlando tangelo 3874	Algerian clementine 279	0.283
AX1	Fairchild mandarin 3559	Orlando tangelo 3874	Algerian clementine 279	0.285
AX1	Nova mandarin 3615	Orlando tangelo 3874	Algerian clementine 279	0.322
AX1	Orlando tangelo 3874	Algerian clementine 279	Fairchild mandarin 3559	0.283
AX1	Algerian clementine 279	Orlando tangelo 3874	Nova mandarin 3615	0.322
AX1	Minneola tangelo 3340	Dancy Weshart 602	Duncan grapefruit 3832	0.429
AX1	Dancy Weshart 602	Duncan grapefruit 3832	Minneola tangelo 3340	0.429
AX1	Duncan grapefruit 3832	Dancy Weshart 602	Minneola tangelo 3340	0.429
AX1	Kinnow 3021	Willowleaf mandarin 3843	King tangor 303	0.261
AX1	Willowleaf mandarin 3843	King tangor 303	Kinnow mandarin 3021	0.261
AX1	King tangor 303	Willowleaf mandarin 3843	Kinnow mandarin 3021	0.261
AX1	Gold Nugget mandarin 3913	Kincy mandarin 3144	Wilking mandarin 3020	0.250
AX1	Kincy mandarin 3144	Wilking mandarin 3020	Gold Nugget mandarin 3913	0.250
AX1	Wilking mandarin 3020	Kincy mandarin 3144	Gold Nugget mandarin 3913	0.250
AX1	Valentine x Kishu #2	Seedless Kishu 3906	Valentine pummelo hybrid 4182	0.547
AX1	Valentine x Kishu #1	Seedless Kishu 3906	Valentine pummelo hybrid 4182	0.538
AX1	Valentine x Kishu #4	Seedless Kishu 3906	Valentine pummelo hybrid 4182	0.508
AX1	Seedless Kishu 3906	Valentine pummelo hybrid 4182	Valentine x Kishu #1	0.538
AX1	Valentine pummelo hybrid 4182	Seedless Kishu 3906	Valentine x Kishu #2	0.547
AX2	Fairchild mandarin 3559	Orlando tangelo 3874	Algerian clementine 279	0.288
AX2	Fairchild mandarin 3559	Orlando tangelo 3874	Algerian clementine 279	0.286
AX2	Nova mandarin 3615	Orlando tangelo 3874	Algerian clementine 279	0.303
AX2	Orlando tangelo 3874	Algerian clementine 279	Fairchild mandarin 3559	0.288
AX2	Algerian clementine 279	Orlando tangelo 3874	Fairchild mandarin 3559	0.288
AX2	Minneola tangelo 3340	Dancy Weshart 602	Duncan grapefruit 3832	0.446
AX2	Dancy Weshart 602	Duncan grapefruit 3832	Minneola tangelo 3340	0.446
AX2	Duncan grapefruit 3832	Dancy Weshart 602	Minneola tangelo 3340	0.446
AX2	Kinnow 3021	Willowleaf mandarin 3843	King tangor 303	0.261
AX2	King tangor 303	Willowleaf mandarin 3843	Kinnow 3021	0.261
AX2	Willowleaf mandarin 3843	King tangor 303	Kinnow 3021	0.261
AX2	Gold Nugget mandarin 3913	Kincy mandarin 3144	Wilking mandarin 3020	0.244
AX2	Kincy mandarin 3144	Wilking mandarin 3020	Gold Nugget mandarin 3913	0.244
AX2	Wilking mandarin 3020	Kincy mandarin 3144	Gold Nugget mandarin 3913	0.244
AX2	Valentine x Kishu #2	Seedless Kishu 3906	Valentine pummelo hybrid 4182	0.576
AX2	Valentine x Kishu #1	Seedless Kishu 3906	Valentine pummelo hybrid 4182	0.551
AX2	Valentine x Kishu #4	Seedless Kishu 3906	Valentine pummelo hybrid 4182	0.517
AX2	Seedless Kishu 3906	Valentine pummelo hybrid 4182	Valentine x Kishu #2	0.576
AX2	Valentine pummelo hybrid 4182	Seedless Kishu 3906	Valentine x Kishu #1	0.551
(b)
Family	Individual	Mendelian Error
F01	Orlando tangelo 3874	113
F01	Algerian clementine 279	56
F01	Fairchild mandarin 3559	168
F02	Rubidoux trifoliate 838	1020
F02	African pummelo 2346	185
F02	African Shaddock x Rubidoux trifoliate 3969	1201
F03	Flying Dragon trifoliate 3330A	478
F03	Sydney hybrid microcitrus hybrid	587
F03	Microcitrus x trifoliate, trifoliate hybrid 3566	1027
F04	Frua mandarin 3022	186
F04	Siamese Acidless pummelo 2240	337
F04	Cocktail pummelo hybrid 3555	519
F05	Marumi SRA489 kumquat 4125	707
F05	West Indian lime 1813	537
F05	Eustis limequat kumquat hybrid 3603	1149
F06	Washington Songuine blood orange 3977	247
F06	Frost Lisbon 3176	548
F06	Orban Lemon 4140	782
F07	Siamese Acidless pummelo 2240	292
F07	Wilking mandarin 3020	187
F07	Siamese Acidless pummelo 2240	476
F08	Fairchild mandarin 3559	32
F08	Fortune mandarin 3560	38
F08	RS99.201-21	76
F09	Pomeroy trifoliate 1717	1283
F09	Chandler pummelo 3224	192
F09	Chandler pummelo x Pomeroy RR86-10-99	1471

## Sheet: S10 26 accessions for phylogeny
Table S10. Twenty-six accessions used to infer phylogenetic relationships among accessions in the citrus variant discovery panel a
and the 26 accessions used in the error simulation study.
Variety Name	CRC	Phylogeny	Simulation
Mexican lime	1710	1	1
Buddha's Hand citron (fingered citron)	3768	1	1
Frost Lisbon lemon	3176	1	1
Hunan pummelo	1225	1	1
Chandler pummelo	3224	1	1
Siamese Acidless pummelo	2240	1	1
Mato Buntan pummelo	3945	1	1
Thong Dee pummelo	3927	1	1
Kao Phuang pummelo	2352	1	1
Tahitian pummelo	3806	1	0
Triumph grapefruit	297	1	1
Duncan grapefruit	3832	1	1
Pineapple sweet orange	3858	1	0
Schaub rough lemon	3879	1	1
W Murcott Afourer mandarin	3953	1	1
Sun Chu Sha mandarin	4003	1	1
Cleopatra mandarin	3844	1	1
C. sunki mandarin	3143	1	1
C. kinokuni	3887	1	1
Changsha mandarin	3577	1	1
Ponkan mandarin	3849	1	0
Dancy Frost mandarin	3026	1	0
Willowleaf mandarin	3843	1	1
De Nules clementine	4056	1	0
Standard sour orange	628	1	1
Flying Dragon trifoliate	3330A	1	1
Chinese sweet orange	3933	0	1
Algerian clementine	279	0	1
Carrizo citrange	2863	0	1
C. kinokuni	696	0	1
Dancy Weshart mandarin	602	0	1
		26	26

[truncated: 2 more sheets: S11 87 accessions for phylogeny, S12 3 trifoliate clusters]
